# Supplementary material for: Boosting the activity of UiO-66(Zr) by defect engineering: efficient aldol condensation of furfural and MIBK for the production of bio jet-fuel precursors
Source: Royal Society of Chemistry journal article supplement (doi:10.1039/d3gc05022j), 2024-01-01
Supplement: d3gc05022j1.pdf [file d3gc05022j1.pdf]

## **Boosting the activity of UiO-66(Zr) by defect engineering: efficient aldol condensation of furfural and MIBK for the production of bio jet-fuel precursors**

María Sanz<sup>a</sup>, Pedro Leo<sup>a</sup>, Carlos Palomino<sup>b</sup>, Marta Paniagua<sup>a</sup>, Gabriel Morales<sup>a,c</sup>, Juan A. Melero<sup>a,c,\*</sup>

<sup>a</sup> Chemical and Environmental Engineering Group. ESCET, Universidad Rey Juan Carlos. c/Tulipán s/n 28933 Móstoles, Spain.

<sup>b</sup> Department of Chemistry, University of the Balearic Islands, Cra. de Valldemossa, 07122, Spain.

<sup>c</sup> Instituto de Investigación de Tecnologías para la Sostenibilidad. ESCET, Universidad Rey Juan Carlos. c/Tulipán s/n 28933 Móstoles, Spain.

**Green Chemistry**

### **Electronic Supplementary Information**

\* Corresponding author:

E-mail: [juan.melero@urjc.es](mailto:juan.melero@urjc.es)

Phone-number: +34-91 665 50 83

**Table ESI-1** Composition in the synthesis media for UiO-66(Zr) materials.

| Sample Name                                  | ZrCl <sub>4</sub><br>(mmol) | MOD<br>(ml) | DMF<br>(ml) | BDC<br>(mmol) | C <sub>MOD</sub><br>(mol/L) | MOD/DMF<br>(mol) | MOD/BDC<br>(mol) |
|----------------------------------------------|-----------------------------|-------------|-------------|---------------|-----------------------------|------------------|------------------|
| UiO-66(Zr)-DF                                | 16.2                        | -           | 100         | 32.4          | -                           | -                | -                |
| UiO-66(Zr)                                   | 6                           | -           | 100         | 6             | -                           | -                | -                |
| Modulator: Formic Acid (pKa = 3.77)          |                             |             |             |               |                             |                  |                  |
| UiO-66(Zr)-FA1                               | 6                           | 2           | 98          | 6             | 0.51                        | 0.04             | 8.45             |
| UiO-66(Zr)-FA2                               | 6                           | 8           | 92          | 6             | 2.04                        | 0.17             | 33.82            |
| UiO-66(Zr)-FA3                               | 6                           | 16          | 84          | 6             | 4.07                        | 0.38             | 67.63            |
| UiO-66(Zr)-FA4                               | 6                           | 20          | 80          | 6             | 5.09                        | 0.49             | 84.54            |
| Modulator: Trifluoroacetic acid (pKa = 0.23) |                             |             |             |               |                             |                  |                  |
| UiO-66(Zr)-TFA1                              | 6                           | 2           | 98          | 6             | 0.26                        | 0.02             | 4.30             |
| UiO-66(Zr)-TFA2                              | 6                           | 8           | 92          | 6             | 1.03                        | 0.09             | 17.19            |
| Modulator: Hydrochloric acid (pKa = -6.3)    |                             |             |             |               |                             |                  |                  |
| UiO-66(Zr)-HCl1                              | 6                           | 2           | 98          | 6             | 0.24                        | 0.02             | 4.05             |
| UiO-66(Zr)-HCl2                              | 6                           | 8           | 92          | 6             | 0.97                        | 0.08             | 16.19            |
| UiO-66(Zr)-HCl3                              | 6                           | 16          | 84          | 6             | 1.95                        | 0.18             | 32.37            |
| UiO-66(Zr)-HCl4                              | 6                           | 20          | 80          | 6             | 2.44                        | 0.24             | 40.46            |
| UiO-66(Zr)-HCl5                              | 6                           | 24          | 76          | 6             | 2.92                        | 0.30             | 48.56            |

MOD = modulator; DMF = N,N'-dimethyl formamide; BDC = benzene-1,4-dicarboxilate.

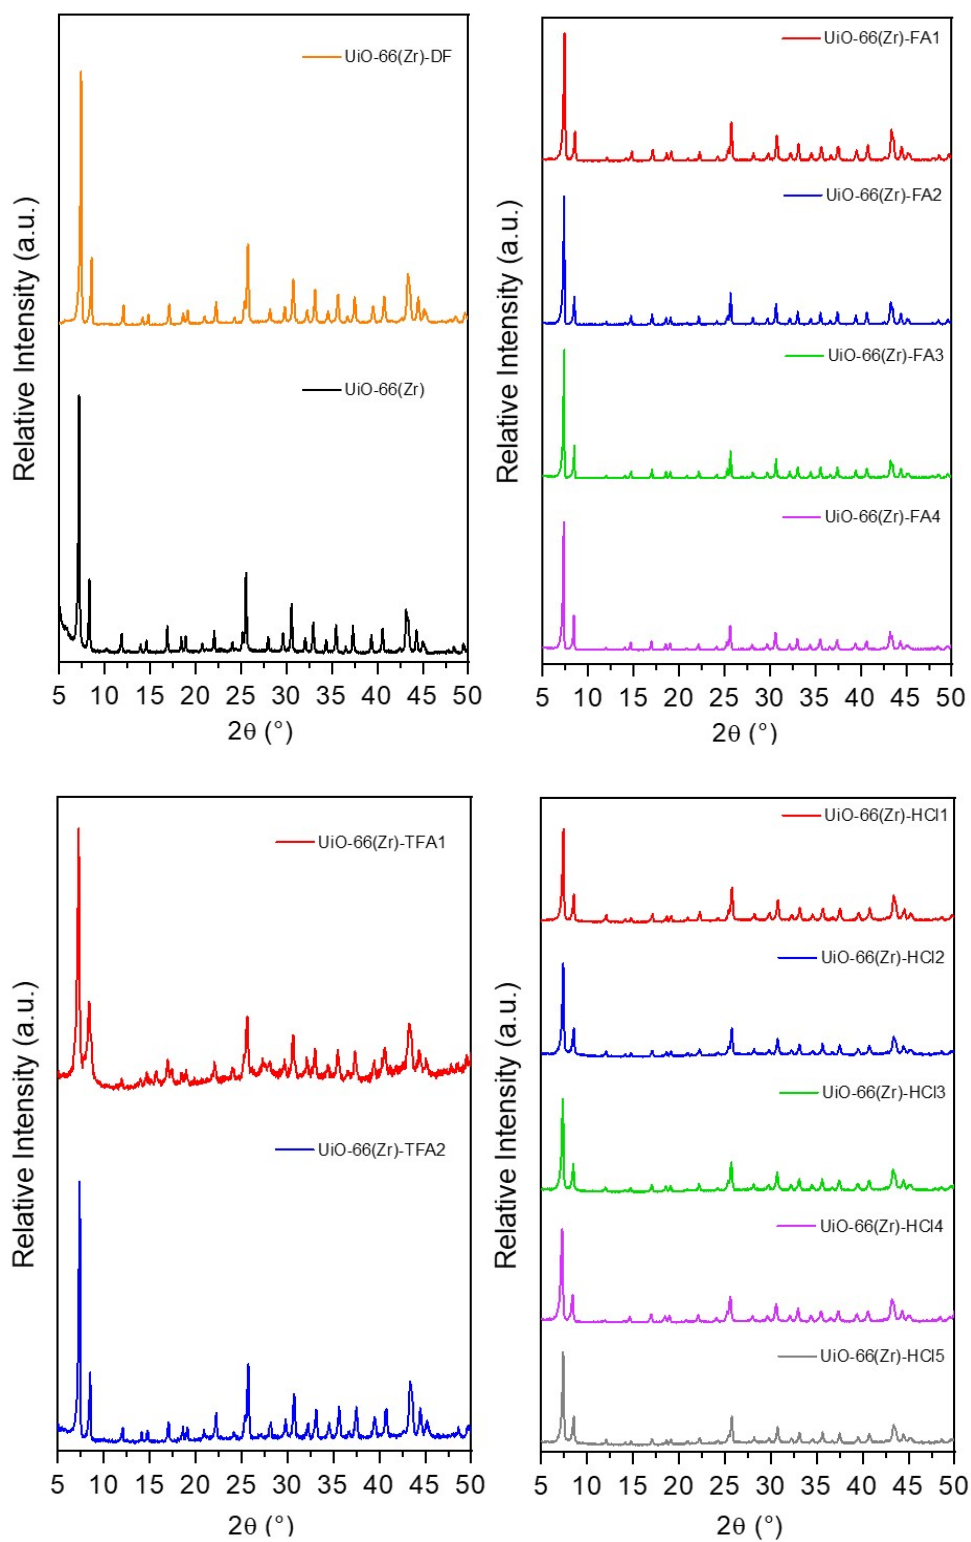

**Fig. ESI-1** Powder X-ray diffraction patterns of UiO-66(Zr)-DF, UiO-66(Zr) parent and modulated UiO-66(Zr) series of materials.

**Table ESI-2** Quantification of linker deficiencies in defective UiO-66 samples.

| Sample          | T <sub>plat</sub> (°C) <sup>a</sup> | W <sub>Exp-Plat</sub> (%) <sup>b</sup> | NL <sub>Exp</sub> <sup>c</sup> | x <sup>d</sup> | Composition at W <sub>Exp.Platt</sub> <sup>e</sup>      |
|-----------------|-------------------------------------|----------------------------------------|--------------------------------|----------------|---------------------------------------------------------|
| UiO-66(Zr)-DF   | 370                                 | 220                                    | 6.00                           | 0.00           | Zr <sub>6</sub> O <sub>6</sub> (BCD) <sub>6</sub>       |
| UiO-66(Zr)      | 370                                 | 204                                    | 5.20                           | 0.80           | Zr <sub>6</sub> O <sub>6.8</sub> (BCD) <sub>5.2</sub>   |
| UiO-66(Zr)-FA1  | 370                                 | 199                                    | 4.95                           | 1.05           | Zr <sub>6</sub> O <sub>7.05</sub> (BCD) <sub>4.95</sub> |
| UiO-66(Zr)-FA2  | 370                                 | 197                                    | 4.88                           | 1.13           | Zr <sub>6</sub> O <sub>7.13</sub> (BCD) <sub>4.87</sub> |
| UiO-66(Zr)-FA3  | 370                                 | 192                                    | 4.60                           | 1.40           | Zr <sub>6</sub> O <sub>7.4</sub> (BCD) <sub>4.6</sub>   |
| UiO-66(Zr)-FA4  | 370                                 | 187                                    | 4.35                           | 1.65           | Zr <sub>6</sub> O <sub>7.65</sub> (BCD) <sub>4.35</sub> |
| UiO-66(Zr)-TFA1 | 390                                 | 194                                    | 4.70                           | 1.30           | Zr <sub>6</sub> O <sub>7.3</sub> (BCD) <sub>4.7</sub>   |
| UiO-66(Zr)-TFA2 | 390                                 | 192                                    | 4.60                           | 1.40           | Zr <sub>6</sub> O <sub>7.4</sub> (BCD) <sub>4.6</sub>   |
| UiO-66(Zr)-HCl1 | 370                                 | 195                                    | 4.75                           | 1.25           | Zr <sub>6</sub> O <sub>7.25</sub> (BCD) <sub>4.75</sub> |
| UiO-66(Zr)-HCl2 | 370                                 | 187                                    | 4.35                           | 1.65           | Zr <sub>6</sub> O <sub>7.65</sub> (BCD) <sub>4.35</sub> |
| UiO-66(Zr)-HCl3 | 370                                 | 186                                    | 4.30                           | 1.70           | Zr <sub>6</sub> O <sub>7.7</sub> (BCD) <sub>4.3</sub>   |
| UiO-66(Zr)-HCl4 | 370                                 | 187                                    | 4.35                           | 1.65           | Zr <sub>6</sub> O <sub>7.65</sub> (BCD) <sub>4.35</sub> |
| UiO-66(Zr)-HCl5 | 370                                 | 184                                    | 4.20                           | 1.80           | Zr <sub>6</sub> O <sub>7.8</sub> (BCD) <sub>4.2</sub>   |

<sup>a</sup> Temperature of the plateau; <sup>b</sup> Experimental weight of the plateau; <sup>c</sup> Number of linkers per defective Zr<sub>6</sub> formula unit calculated as (W<sub>Exp-Plat</sub> - W<sub>End</sub>)/Wt.PL<sub>Theo</sub> being Wt.PL<sub>Theo</sub>=20 % when the end weight of the TGA run is normalized to 100 % (W<sub>End</sub> = 100 %); <sup>d</sup> Number of linker deficiencies per Zr<sub>6</sub> formula unit calculated as 6 - NL<sub>Exp</sub>; <sup>e</sup> Composition of the material assuming the following formula Zr<sub>6</sub>O<sub>6+x</sub>(BDC)<sub>6-x</sub>

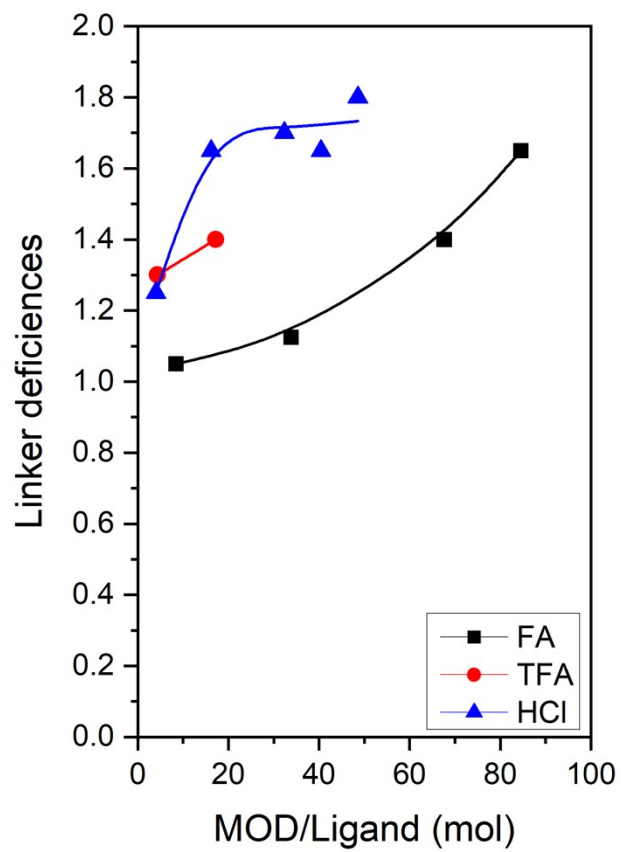

**Fig. ESI-2.** Linker deficiencies corresponding to modulated UiO-66(Zr) series of materials.

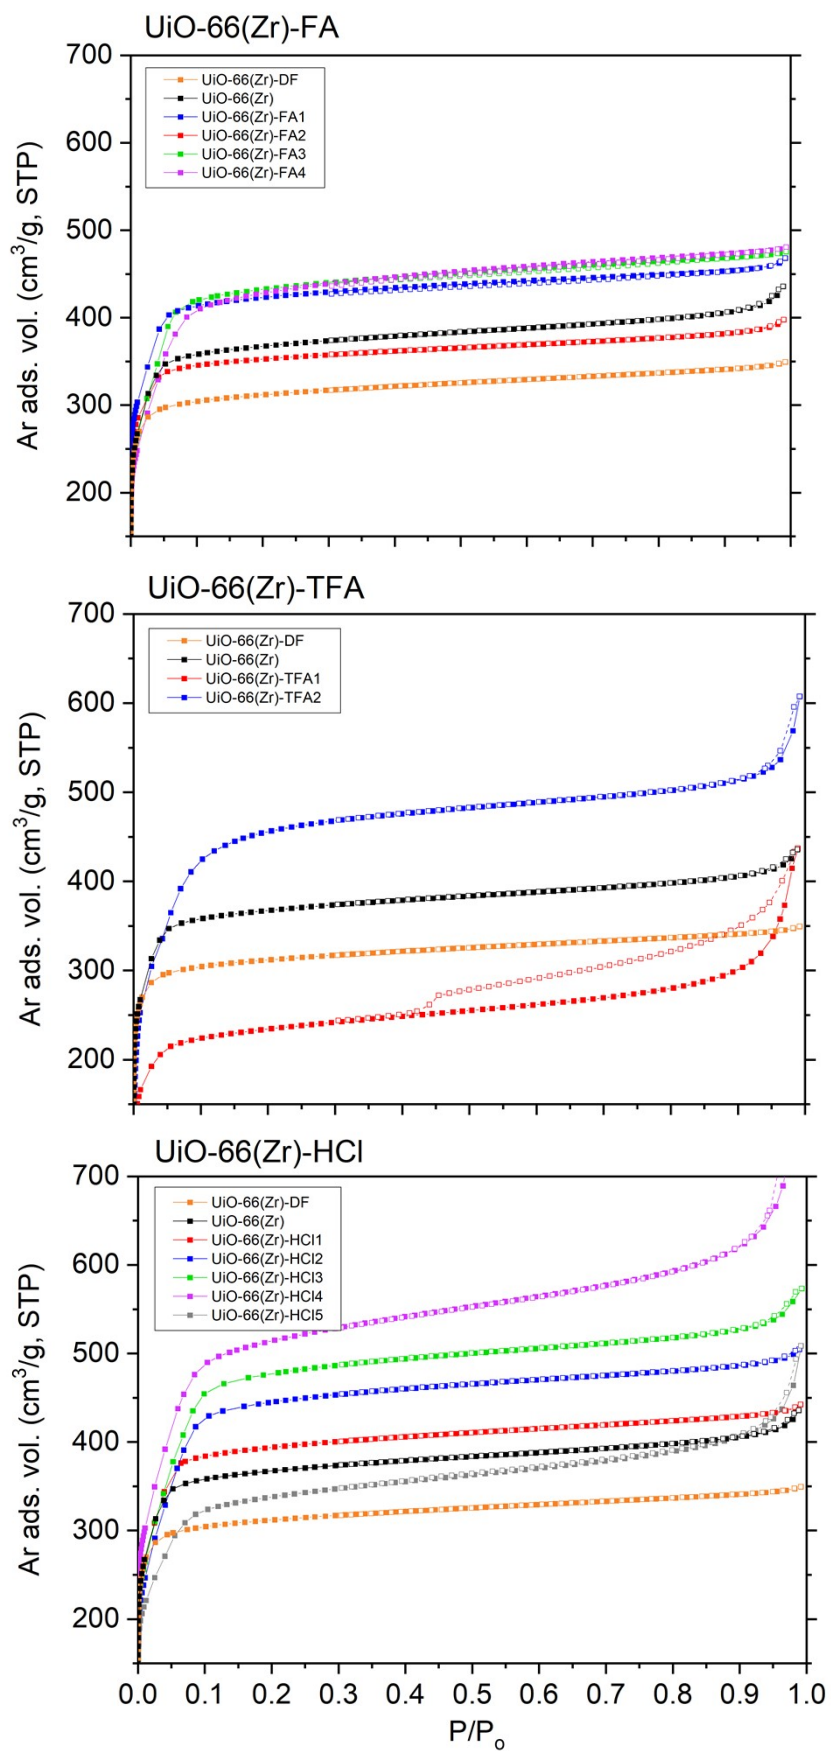

**Fig. ESI-3** Argon adsorption-desorption isotherms of UiO-66(Zr)-DF, UiO-66(Zr) parent and modulated UiO-66(Zr) series of materials.

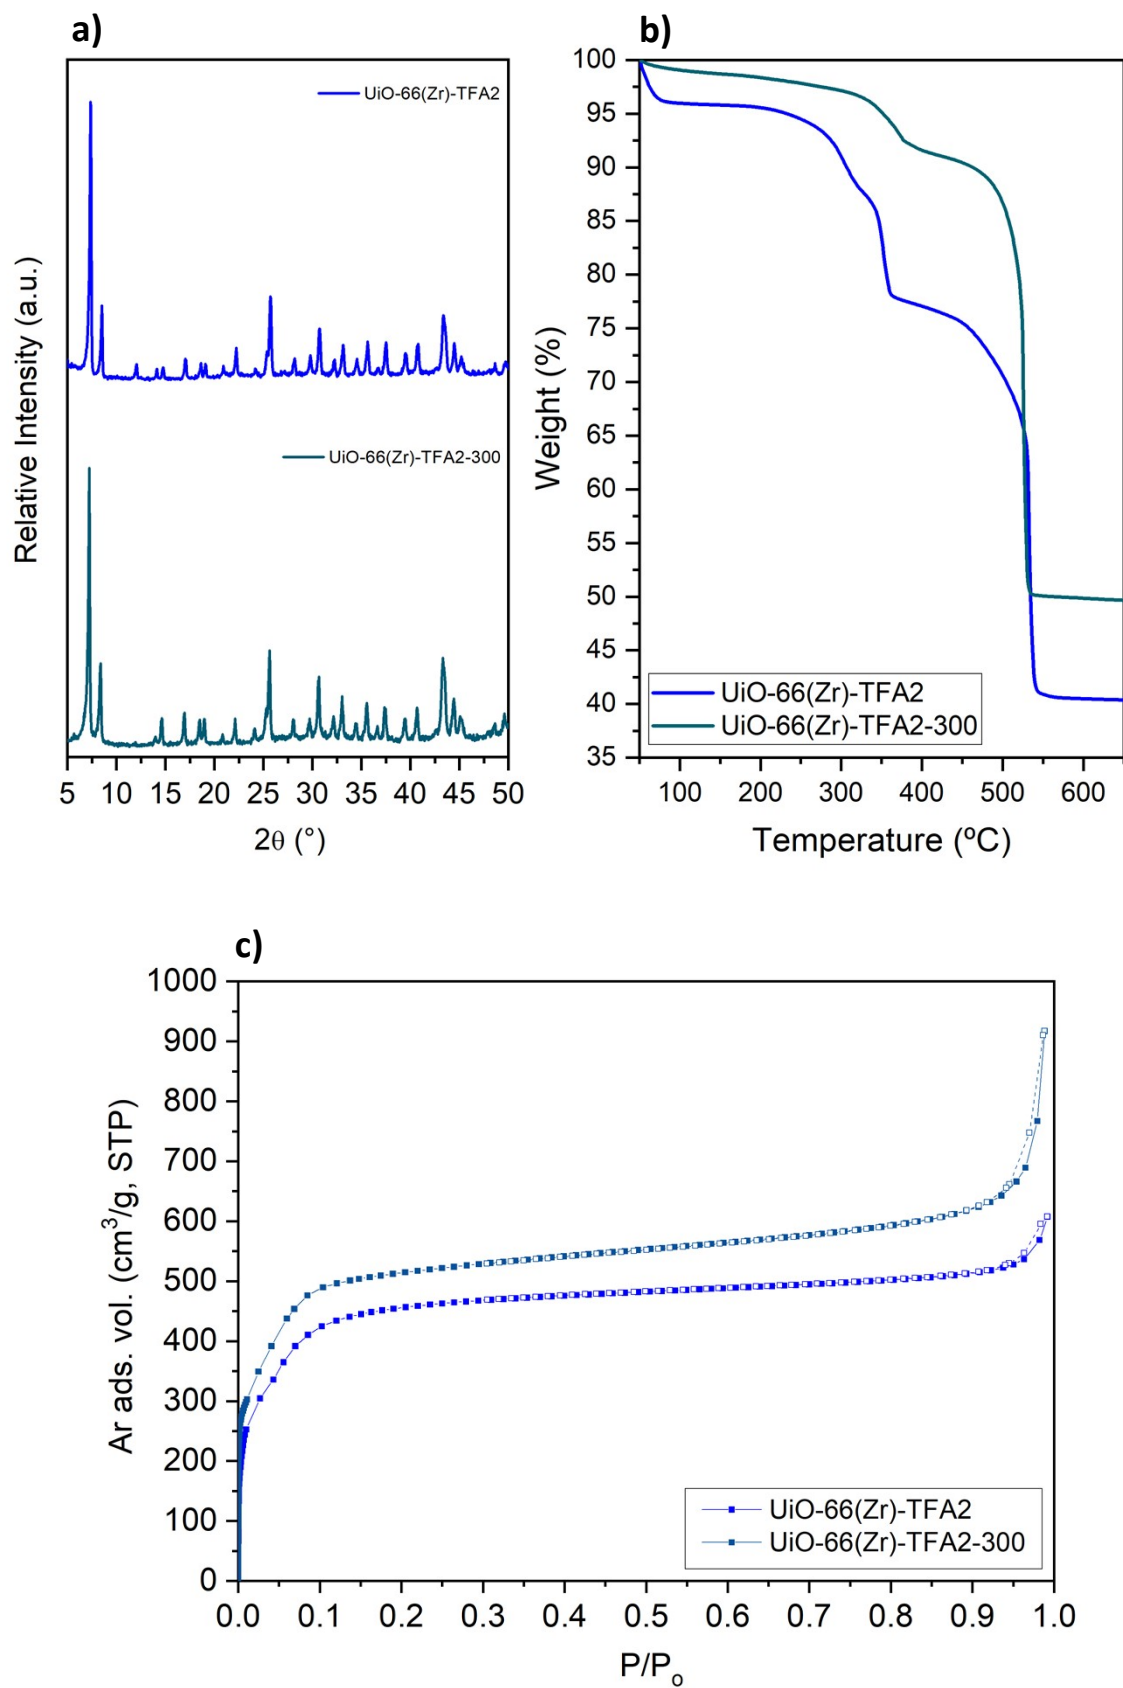

**Fig. ESI-4** a) Powder X-ray diffraction patterns; b) Thermogravimetry analysis, and c) Argon adsorption-desorption isotherms of UiO-66(Zr)-TFA2 and UiO-66(Zr)-TFA2-300.

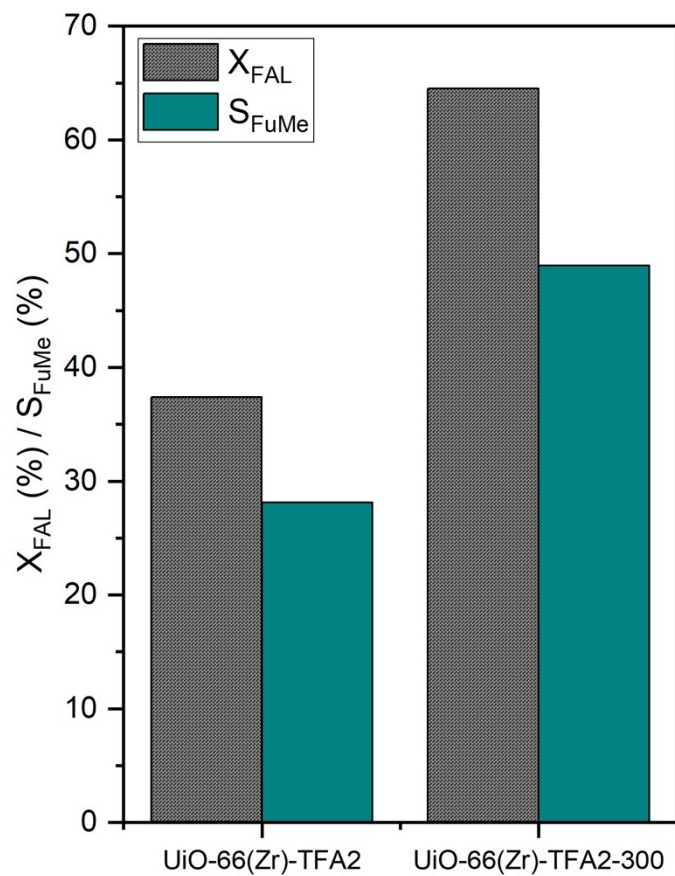

**Fig. ESI-5** Catalytic activity of UiO-66(Zr)-TFA2 and UiO-66(Zr)-TFA2-300 in the aldol condensation of FAL and MIBK. Reaction conditions: time = 4 h; temperature = 130 °C; MIBK/FAL molar ratio = 4; FAL/Cat mass ratio = 10.



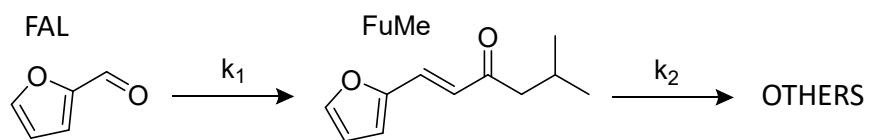

**Scheme ESI-1.** Transformations and constants considered for the kinetics analysis of the aldol condensation of FAL and MIBK.

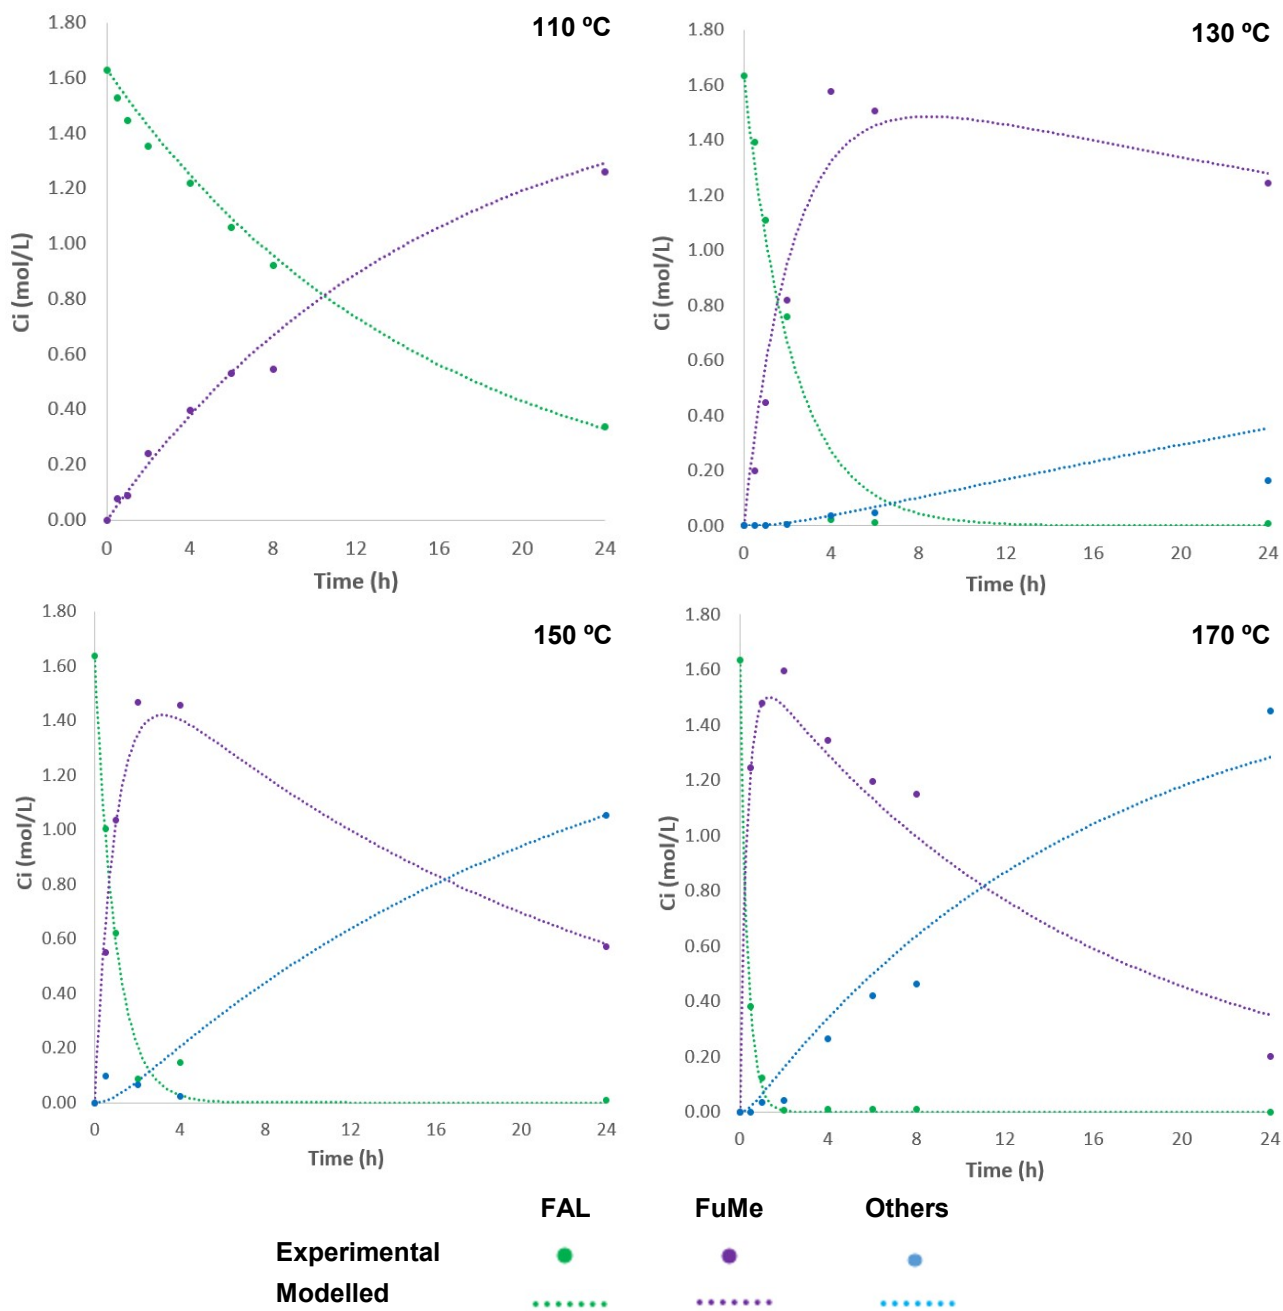

**Fig. ESI-6.** Experimental (symbols) and modelled (dash lines) concentrations of the compounds involved in the aldol condensation of FAL and MIBK over UiO-66(Zr)-HCl<sub>3</sub>. Reaction conditions: MIBK/FAL molar ratio = 4/1; FAL/Cat mass ratio = 10/1.

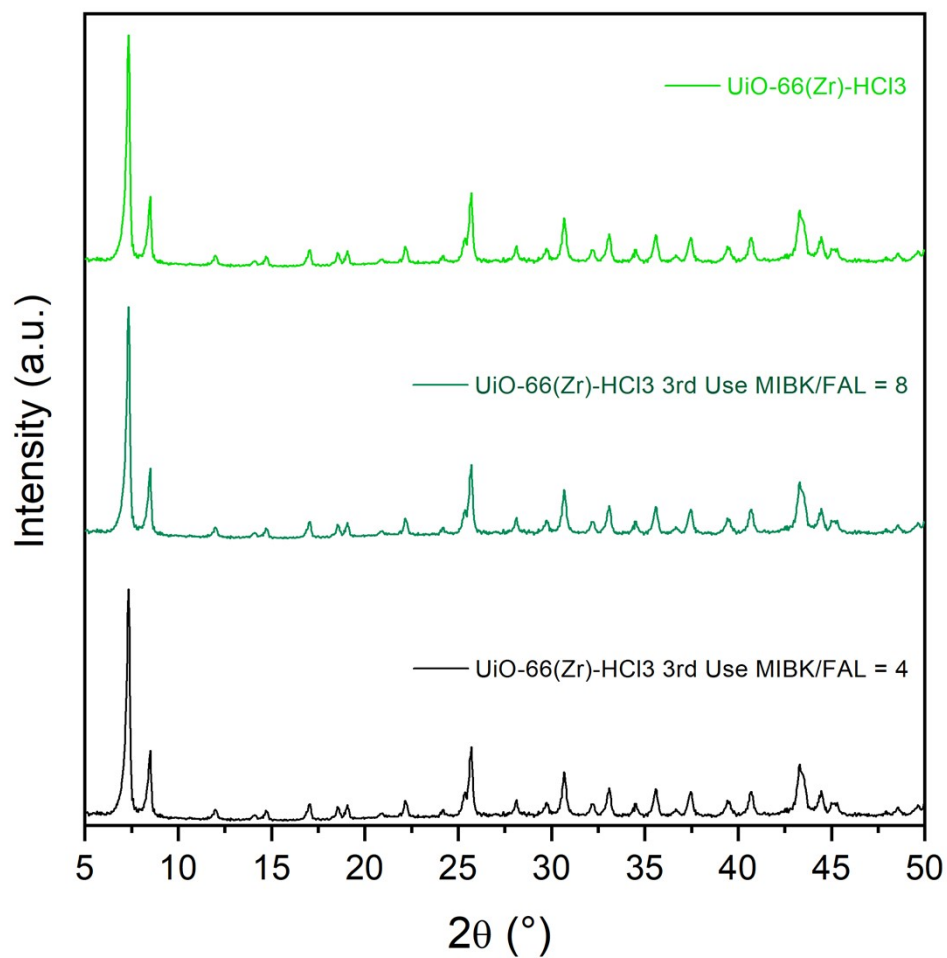

**Fig. ESI-7.** Powder X-ray diffraction patterns of the UiO-66(Zr)-HCl<sub>3</sub>, fresh and after three consecutive uses in reaction under different dilution. Reaction conditions: time = 3 h; temperature = 130 °C; MIBK/FAL molar ratio = 4 (FAL/Cat = 10) and 8 (FAL/Cat = 5).
